# Supplementary material
Source: ML conference proceedings conference paper supplement (https://proceedings.neurips.cc/paper_files/paper/2022/hash/8443219a991f068c34d9491ad68ffa94-Abstract.html)
Supplement: Supplementary file 1 [file 8443219a991f068c34d9491ad68ffa94-Supplemental-Conference.zip]

Archive with 2 entries (2 files):
- lcb_bounds_neurips.pdf
- __MACOSX/._lcb_bounds_neurips.pdf
